# Supplementary material for: A comparative study to reveal the influence of typhoons on the transport, production and accumulation of O 3 in the Pearl River Delta, China
Source: Copernicus journal article supplement (doi:10.5194/acp-21-11593-2021), 2021-08-04
Supplement: Supplementary file 1 [file acp-21-11593-2021-supplement.pdf]

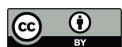

*Supplement of*

**A comparative study to reveal the influence of typhoons on the transport, production and accumulation of O<sub>3</sub> in the Pearl River Delta, China**

**Kun Qu et al.**

*Correspondence to:* Xuesong Wang (xswang@pku.edu.cn) and Yuanhang Zhang (yhzhang@pku.edu.cn)

The copyright of individual parts of the supplement might differ from the article licence.

## **S1. Evaluation of WRF and CMAQ modelling results within the PRD**

The WRF-modelling results of air temperature, relative humidity (RH), zonal and meridional wind speeds in the PRD were evaluated based on the same-period routine monitoring datasets collected in 29 national meteorological sites (Fig. S1a). Statistics listed in Table S5 indicate low biases and high correlations between the modelled and observational series of air temperature and RH. Wind speeds in two directions were overall overestimated by 0.6–0.8 m/s, but it was normally found in the PRD modelling studies (Chen et al, 2018; Deng et al, 2018; Tse et al, 2018; Yuan et al, 2018). Low modelling resolution, as well as coarse descriptions of surface features might contribute to these biases. High R values ( $>0.8$ ) of wind speeds, especially meridional wind speeds, suggest that the model was capable of describing the variation of wind fields within the PRD. Acceptable performance in the WRF modelling ensures the validity of the meteorological inputs for the CMAQ modelling.

The comparisons of observational and modelling mean  $O_3$  MDA8 and daily  $NO_2$  concentrations in 18 sites of the Guangzhou-Hong Kong-Macao regional monitoring network (Fig. S1b) in the two represented months are shown in Fig. S11a–d. High FAC2 and R, low NMB indicate good performance in the modelling of these two species. We also evaluated the performance of the daily mixing ratios of non-methane hydrocarbons (NMHCs) based on the GC/MS measurements in five representative sites within the PRD (Zhudong, Modiesha, Heshan Supersite, Xijiao and Daxuecheng, locations shown in Fig. S1b), which is overall satisfying, as well (Fig. S11e–f). Note that the notable overestimations of  $NO_2$  and NMHCs levels can be found during 11–13 July, when the PRD was under the influence of heavy rainfall. Since these days were classified as clean days and were excluded in comparisons, it did not affect the final conclusions.

As shown in Fig. S6, there is no significant difference between the modelling performance of meteorological parameters and pollutant concentrations in the typhoon-induced and no-typhoon scenarios, ensuring the validity of comparisons using WRF and CMAQ.

## S2. Tables

**Table S1.** Information on the O<sub>3</sub> pollution days in October, 2014–2018.

| Date                | Number<br>of Days | Classification                | Weather systems                 |
|---------------------|-------------------|-------------------------------|---------------------------------|
| October 2–3, 2014   | 2                 | Autumn, typhoon-induced       | The typhoon Phanfone            |
| October 5, 2014     | 1                 | Autumn, typhoon-induced       | The typhoon Phanfone & Vongfong |
| October 7–11, 2014  | 5                 | Autumn, typhoon-induced       | The typhoon Vongfong            |
| October 14–16, 2015 | 3                 | Autumn, typhoon-induced       | The typhoon Koppu & Champi      |
| October 21, 2015    | 1                 | Autumn, typhoon-induced       | The typhoon Champi              |
| October 4, 2016     | 1                 | Autumn, typhoon-induced       | The typhoon Chaba & Aere        |
| October 14, 2016    | 1                 | Autumn, typhoon-induced       | The typhoon Sarika              |
| October 11, 2017    | 1                 | Autumn, typhoon-induced       | The typhoon Khanum              |
| October 18, 2017    | 1                 | Autumn, typhoon-induced       | The typhoon Lan                 |
| October 22, 2017    | 1                 | Autumn, typhoon-induced       | The typhoon Lan & Saola         |
| October 25–29, 2017 | 5                 | Autumn, typhoon-induced       | The typhoon Saola               |
| October 1–3, 2018   | 5                 | Autumn, typhoon-induced       | The typhoon Kong-rey            |
| October 5–6, 2018   |                   |                               |                                 |
| October 27–29, 2018 | 3                 | Autumn, typhoon-induced       | The typhoon Yutu                |
| October 17–19, 2015 | 3                 | Autumn, close typhoon-induced | The typhoon Koppu & Champi      |
| October 5–6, 2016   | 2                 | Autumn, close typhoon-induced | The typhoon Chaba & Aere        |
| October 10, 2016    | 1                 | Autumn, close typhoon-induced | The typhoon Aere & Songda       |
| October 20, 2016    | 1                 | Autumn, close typhoon-induced | The typhoon Haima               |
| October 12–13, 2017 | 2                 | Autumn, close typhoon-induced | The typhoon Khanum              |
| October 4, 2018     | 1                 | Autumn, close typhoon-induced | The typhoon Kong-rey            |
| October 1, 2014     | 1                 | Autumn, far typhoon-induced   | The typhoon Phanfone            |
| October 6, 2014     | 1                 | Autumn, far typhoon-induced   | The typhoon Phanfone & Vongfong |
| October 13, 2015    | 1                 | Autumn, far typhoon-induced   | The typhoon Koppu & Champi      |
| October 22–25, 2015 | 4                 | Autumn, far typhoon-induced   | The typhoon Champi              |
| October 23–24, 2017 | 2                 | Autumn, far typhoon-induced   | The typhoon Lan & Saola         |
| October 14–21, 2014 | 8                 | Autumn, no-typhoon            | Subtropical high                |
| October 15–31, 2014 | 7                 | Autumn, no-typhoon            | Subtropical high                |
| October 9, 2015     | 1                 | Autumn, no-typhoon            | Continental cold high           |
| October 28, 2015    | 1                 | Autumn, no-typhoon            | Subtropical high                |
| October 27–28, 2016 | 2                 | Autumn, no-typhoon            | Foreside of a cold front        |
| October 31, 2016    | 1                 | Autumn, no-typhoon            | Subtropical high                |
| October 6–8, 2017   | 3                 | Autumn, no-typhoon            | Subtropical high                |
| October 30–31, 2017 | 2                 | Autumn, no-typhoon            | Sea high                        |
| October 7–9, 2018   | 3                 | Autumn, no-typhoon            | Foreside of a cold front        |
| October 12, 2018    | 1                 | Autumn, no-typhoon            | Sea high                        |

**Table S2.** Information on the O<sub>3</sub> pollution days in July, 2014–2018.

| Date             | Number<br>of Days | Classification                | Weather systems                   |
|------------------|-------------------|-------------------------------|-----------------------------------|
| July 6–9, 2014   | 4                 | Summer, typhoon-induced       | The typhoon Neoguri               |
| July 16–17, 2014 | 2                 | Summer, typhoon-induced       | The typhoon Rammasun              |
| July 21–25, 2014 | 5                 | Summer, typhoon-induced       | The typhoon Matmo                 |
| July 29–31, 2014 | 3                 | Summer, typhoon-induced       | The typhoon Nakri & Halong        |
| July 11–12, 2015 | 2                 | Summer, typhoon-induced       | The typhoon Chan-hom & Nangka     |
| July 7–8, 2016   | 2                 | Summer, typhoon-induced       | The typhoon Nepartak              |
| July 30–31, 2016 | 2                 | Summer, typhoon-induced       | The typhoon Nida                  |
| July 25–27, 2017 | 3                 | Summer, typhoon-induced       | The typhoon Nesat & Noru          |
| July 10, 2018    | 1                 | Summer, typhoon-induced       | The typhoon Maria                 |
| July 9, 2016     | 1                 | Summer, close typhoon-induced | The typhoon Nepartak              |
| July 22, 2017    | 1                 | Summer, close typhoon-induced | The typhoon Roke                  |
| July 28–31, 2017 | 4                 | Summer, close typhoon-induced | The typhoon Nesat, Noru & Haitang |
| July 11, 2018    | 1                 | Summer, close typhoon-induced | The typhoon Maria                 |
| July 17, 2018    | 1                 | Summer, close typhoon-induced | The typhoon Son-tinh              |
| July 13–16, 2015 | 4                 | Summer, far typhoon-induced   | The typhoon Nangka                |
| July 8, 2018     | 1                 | Summer, far typhoon-induced   | The typhoon Maria                 |
| July 28–29, 2018 | 2                 | Summer, far typhoon-induced   | The typhoon Jongdari              |
| July 10, 2016    | 1                 | \                             | The typhoon Nepartak*             |
| July 12, 2018    | 1                 | \                             | The typhoon Maria**               |
| July 19–22, 2018 | 4                 | \                             | The typhoon Son-tinh & Ampil**    |
| July 28, 2014    | 1                 | Summer, no-typhoon            | Subtropical high                  |
| July 31, 2015    | 1                 | Summer, no-typhoon            | Subtropical high                  |
| July 22–26, 2016 | 5                 | Summer, no-typhoon            | Subtropical high                  |
| July 29, 2016    | 1                 | Summer, no-typhoon            | Subtropical high                  |
| July 13, 2017    | 1                 | Summer, no-typhoon            | Subtropical high                  |
| July 20, 2017    | 1                 | Summer, no-typhoon            | Subtropical high                  |

\* No typhoon record at 14:00 LT.

\*\* Typhoons located to the west of the PRD.

**Table S3.** The numbers, proportions of O<sub>3</sub> pollution days, and O<sub>3</sub> concentrations in each month.

| Parameters                                            | October<br>2014 | October<br>2015 | October<br>2016 | October<br>2017 | October<br>2018 | July<br>2014 | July<br>2015 | July<br>2016 | July<br>2017 | July<br>2018 |
|-------------------------------------------------------|-----------------|-----------------|-----------------|-----------------|-----------------|--------------|--------------|--------------|--------------|--------------|
| Number of O <sub>3</sub> pollution days               | 25              | 14              | 9               | 17              | 13              | 15           | 7            | 12           | 10           | 11           |
| With typhoons                                         | 10              | 12              | 6               | 12              | 9               | 14           | 6            | 6            | 8            | 11           |
| Typhoon-induced days                                  | 8               | 4               | 2               | 8               | 8               | 14           | 2            | 4            | 3            | 5            |
| Without typhoons (no-typhoon days)                    | 15              | 2               | 3               | 5               | 4               | 1            | 1            | 6            | 2            | 0            |
| Mean PRD-max O <sub>3</sub> MDA8 (µg/m <sup>3</sup> ) |                 |                 |                 |                 |                 |              |              |              |              |              |
| Typhoon-induced days                                  | 199.4           | 221.2           | 149.9           | 200.1           | 200.7           | 209.4        | 184.1        | 246.3        | 202.9        | 171.6        |
| No-typhoon days                                       | 190.7           | 174.7           | 167.6           | 189.4           | 211.4           | 220.0        | 140.4        | 206.0        | 140.9        | /            |
| Mean PRD-max O <sub>3</sub> MDA1 (µg/m <sup>3</sup> ) |                 |                 |                 |                 |                 |              |              |              |              |              |
| Typhoon-induced days                                  | 230.1           | 261.5           | 207.0           | 239.1           | 230.1           | 272.4        | 213.5        | 302.5        | 242.3        | 220.8        |
| No-typhoon days                                       | 234.5           | 219.0           | 220.0           | 219.6           | 250.0           | 253.0        | 240.0        | 256.5        | 216.5        | /            |

**Table S4.** The numbers (percentages) of O<sub>3</sub> pollution days corresponding to different weathers in Guangzhou in four scenarios (data source: tianqihoubao (historical weather records), <http://www.tianqihoubao.com/lishi/guangzhou.html>).

| Weathers            | Oct. 2014–2018<br>Typhoon-induced | Oct. 2014–2018<br>No-typhoon | July 2014–2018<br>Typhoon-induced | July 2014–2018<br>No-typhoon |
|---------------------|-----------------------------------|------------------------------|-----------------------------------|------------------------------|
| Sunny               | 31 (63%)                          | 12 (41%)                     | 13 (29%)                          | 2 (20%)                      |
| Cloudy              | 16 (33%)                          | 17 (59%)                     | 18 (40%)                          | 4 (40%)                      |
| Overcast            | 2 (4%)                            | /                            | /                                 | /                            |
| Shower              | /                                 | /                            | /                                 | 1 (2%)                       |
| Thunder-shower      | /                                 | /                            | 12 (27%)                          | 3 (30%)                      |
| Light/Moderate Rain | /                                 | /                            | 1 (2%)                            | /                            |
| Heavy Rain          | /                                 | /                            | 1 (2%)                            | /                            |

**Table S5.** Statistics of the WRF modelling performance of air temperature, RH, zonal and meridional wind speeds in October 2015 and July 2016.

| Parameters            | Statistics | October 2015 | July 2016 |
|-----------------------|------------|--------------|-----------|
| Air Temperature       | MB* (K)    | -0.46        | 0.03      |
|                       | RMSE** (K) | 0.86         | 1.27      |
|                       | R***       | 0.98         | 0.90      |
| Relative Humidity     | MB (%)     | -3.13        | -5.29     |
|                       | RMSE (%)   | 5.01         | 8.11      |
|                       | R          | 0.96         | 0.90      |
| Zonal Wind Speed      | MB (m/s)   | -0.72        | -0.17     |
|                       | RMSE (m/s) | 0.82         | 0.74      |
|                       | R          | 0.78         | 0.89      |
| Meridional Wind Speed | MB (m/s)   | -0.62        | 0.77      |
|                       | RMSE (m/s) | 1.05         | 1.11      |
|                       | R          | 0.93         | 0.91      |

\* MB, mean bias.

\*\* RMSE, root-mean-square error.

\*\*\* R, correlation factor.

**Table S6.** The modelling performance statistics of meteorological parameters and pollutant concentrations on the typhoon-induced and no-typhoon days of two represented months.

| Parameters          | Statistics              | Typhoon-induced,<br>Oct. 2015 | No-typhoon,<br>Oct. 2015 | Typhoon-induced,<br>July 2016 | No-typhoon,<br>July 2016 |
|---------------------|-------------------------|-------------------------------|--------------------------|-------------------------------|--------------------------|
| Air Temperature     | MB* (K)                 | -0.51                         | -0.24                    | 0.52                          | -0.66                    |
|                     | RMSE** (K)              | 2.16                          | 1.70                     | 2.45                          | 1.92                     |
| Relative Humidity   | MB (%)                  | -5.33                         | -3.43                    | -6.85                         | -2.83                    |
|                     | RMSE (%)                | 14.45                         | 10.58                    | 14.31                         | 11.27                    |
| Wind Speed          | MB (m/s)                | 0.52                          | 0.61                     | 0.09                          | 0.15                     |
|                     | RMSE (m/s)              | 1.21                          | 1.18                     | 1.23                          | 1.04                     |
| O <sub>3</sub> MDA8 | MB (µg/m <sup>3</sup> ) | 8.5                           | 19.1                     | 12.6                          | 16.0                     |
|                     | NMB***                  | 0.05                          | 0.15                     | 0.08                          | 0.12                     |
| NO <sub>2</sub>     | MB (µg/m <sup>3</sup> ) | -16.1                         | -12.3                    | -5.4                          | 4.1                      |
|                     | NMB                     | -0.35                         | -0.28                    | -0.17                         | 0.21                     |
| NMHCs               | MB (µg/m <sup>3</sup> ) | -5.0                          | -3.7                     | -4.9                          | -5.0                     |
|                     | NMB                     | -0.20                         | -0.14                    | -0.33                         | -0.31                    |

\* MB, mean bias.

\*\* RMSE, root-mean-square error.

\*\*\* NMB, normalized mean bias.

### S3. Figures

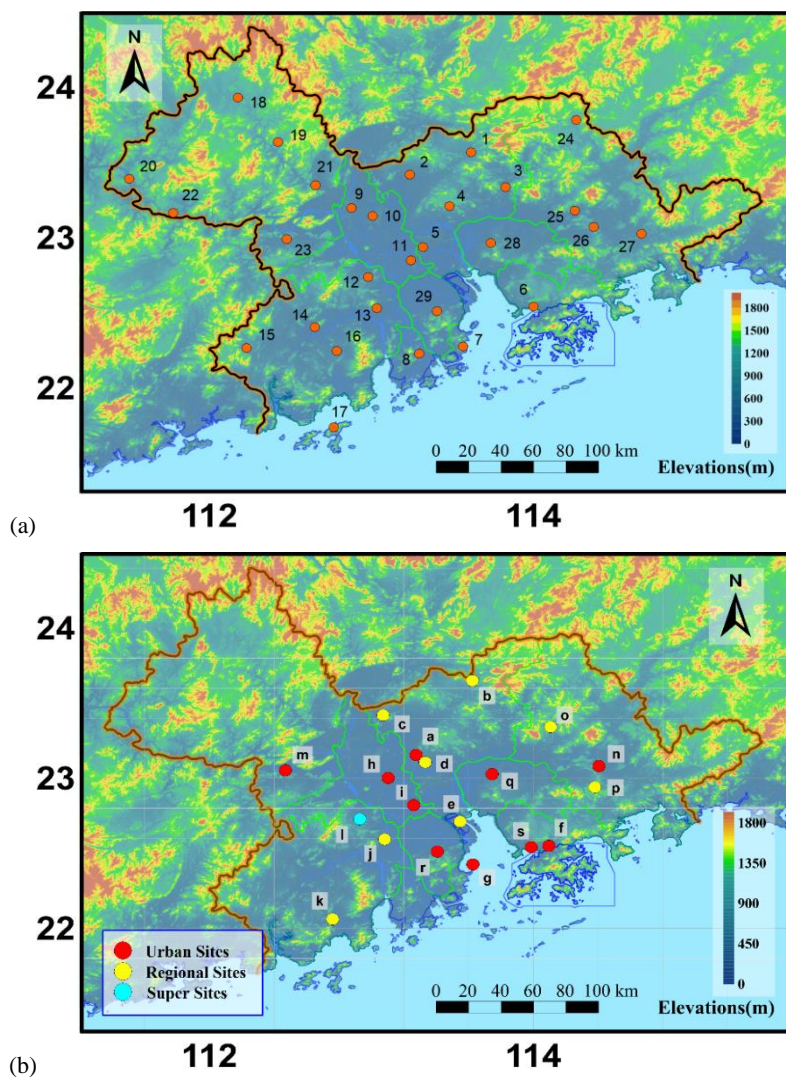

**Figure S1.** (a) The spatial distribution of 29 national meteorological sites within the PRD: 1. Conghua; 2. Huadu; 3. Zengcheng; 4. Huangpu; 5. Panyu; 6. Shenzhen; 7. Zhuhai; 8. Doumen; 9. Sanshui; 10. Nanhai; 11. Shunde; 12. Heshan; 13. Xinhui; 14. Kaiping; 15. Enping; 16. Taishan; 17. Shangchuandao; 18. Huaiji; 19. Guangning; 20. Fengkai; 21. Sihui; 22. Deqing; 23. Gaoyao; 24. Longmen; 25. Boluo; 26. Huiyang; 27. Huidong; 28. Dongguan; 29. Zhongshan.

(b) The spatial distribution of the sites of the Guangdong-Hong Kong-Macao regional monitoring network (the site a–r) and the GC/MS measurements (the site c, d, l, o, s): a. Luhui; b. Tianhu; c. Zhudong; d. Modiesha; e. Wanqingsha; f. Liyuan; g. Tangjia; h. Huijingcheng; i. Jinjuju; j. Donghu; k. Duanfen; l. Heshan Supersite; m. Chengzhongzizhan; n. Xiapu; o. Xijiao; p. Jinguowan; q. Nanchengyuanling; r. Zimaling; s. Daxuecheng.



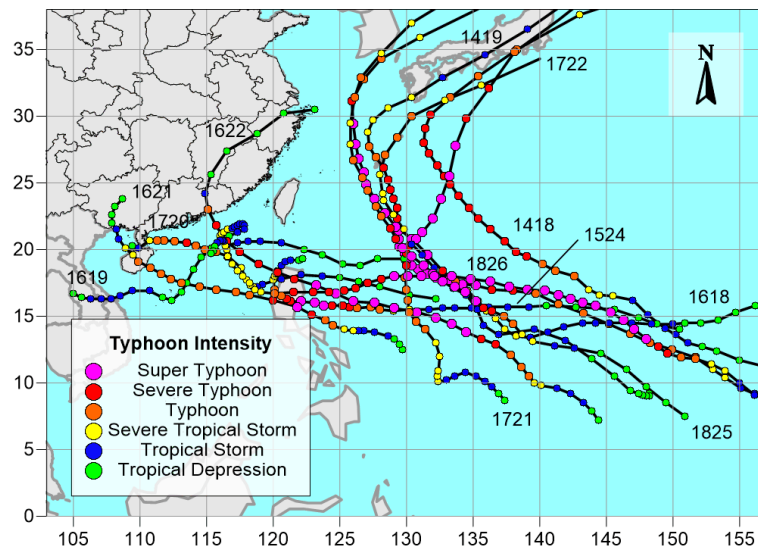

**Figure S2.** The tracks of typhoons related to O<sub>3</sub> pollution in the PRD in October, 2014–2018. The 4-digit identification numbers of all typhoons are also shown in plot.

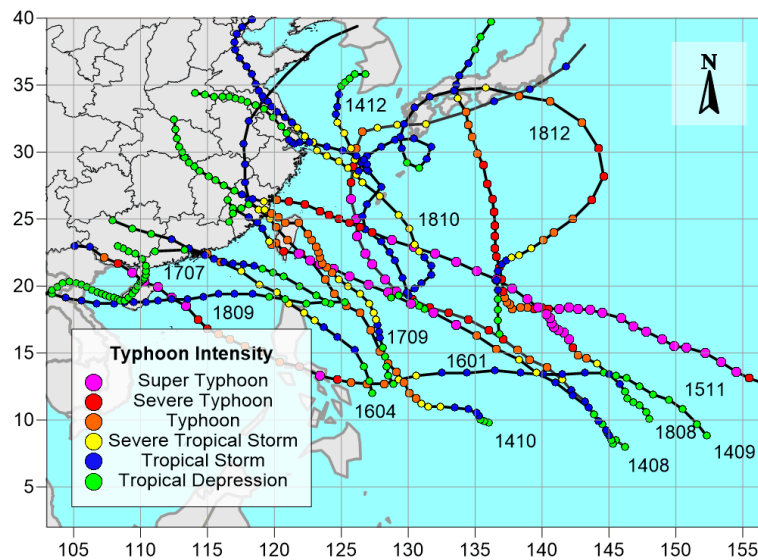

**Figure S3.** The tracks of typhoons related to O<sub>3</sub> pollution in the PRD in July, 2014–2018. The 4-digit identification numbers of all typhoons are also shown in plot.

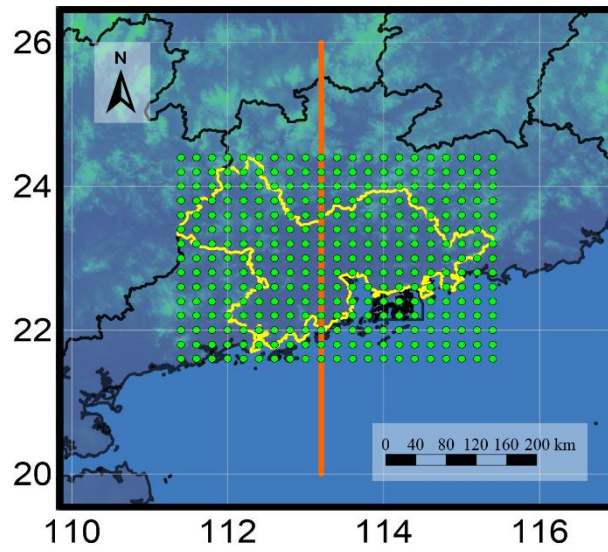

**Figure S4.** Geographical information used in this study: (1) the matrix of starting points (green) and the boarder of the PRD (yellow) in the calculation of APRTs; (2) the cross section was made along the orange line (from 26.0°N to 20.0°N along the 113.2°E longitude line).

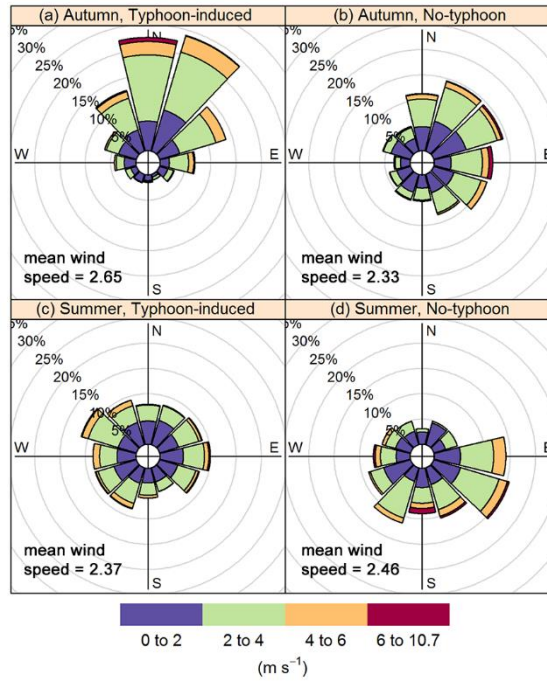

**Figure S5.** Wind roses at 14:00 LT in four scenarios: (a) autumn, typhoon-induced; (b) autumn, no-typhoon; (c) summer, typhoon-induced; (d) summer, no-typhoon. The routine monitoring data collected in 29 meteorological sites within the PRD were used.

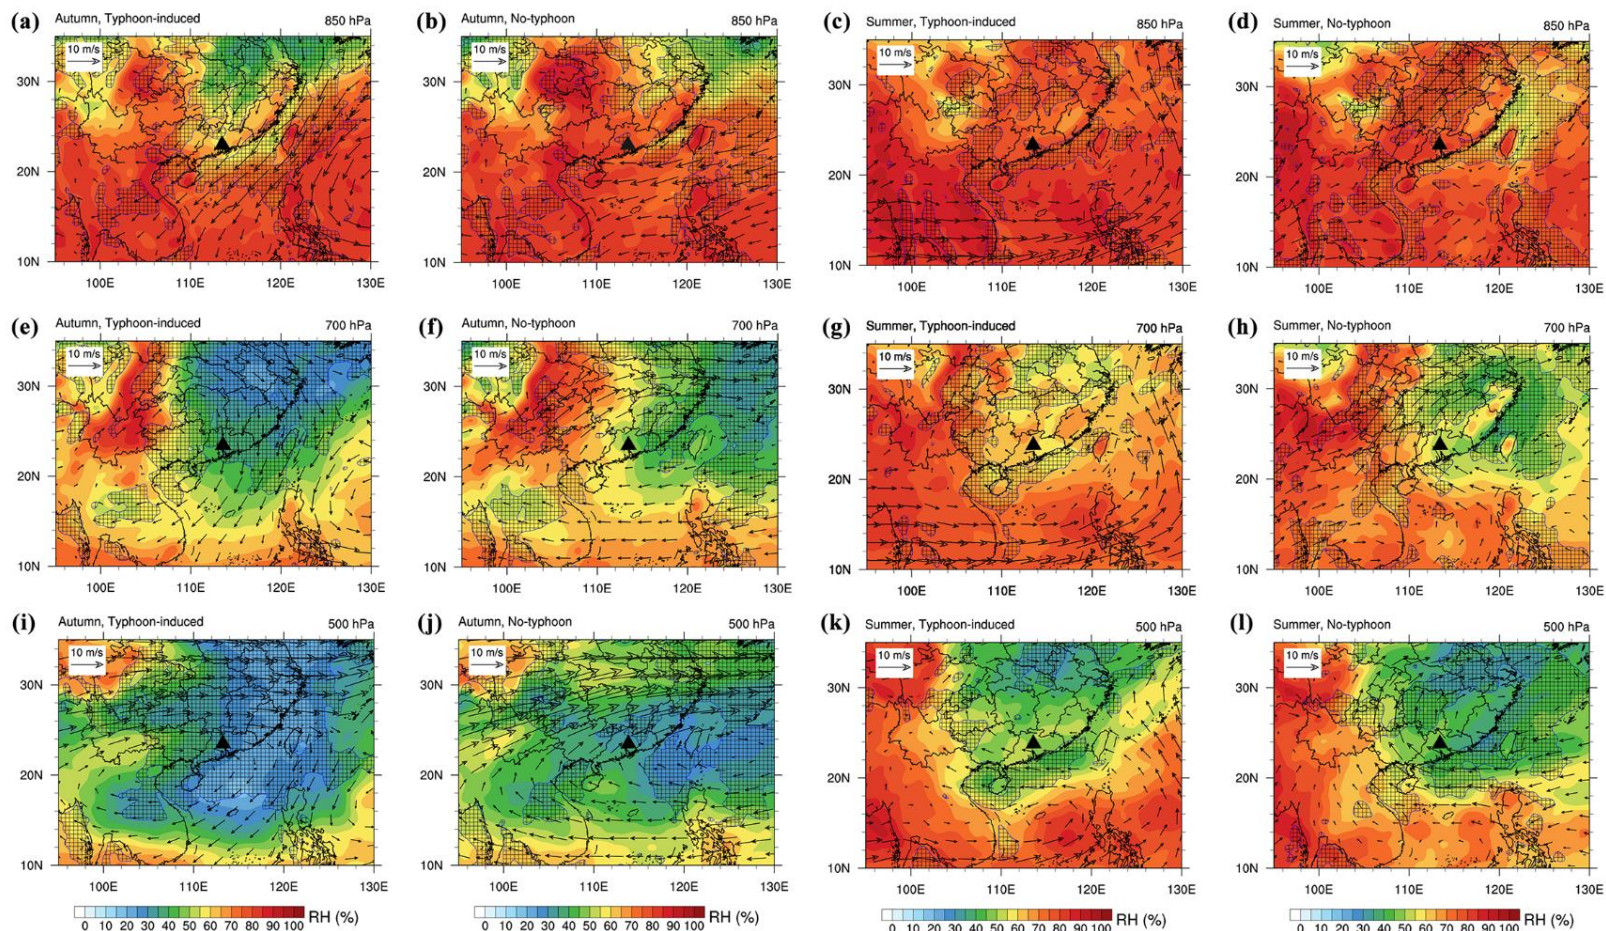

**Figure S6.** Relative humidity (%) and wind fields at the height of (a–d) 850 hPa, (e–h) 700 hPa, and (i–l) 500 hPa at 14:00 LT for the four scenarios: (a, e, i) autumn, typhoon-induced; (b, f, j) autumn, no-typhoon; (c, g, k) summer, typhoon-induced; and (d, h, l) summer, no-typhoon. The black triangle in each plot indicates the PRD. The gridded areas indicate that vertical wind speed is less than 0, or downdrafts occur.



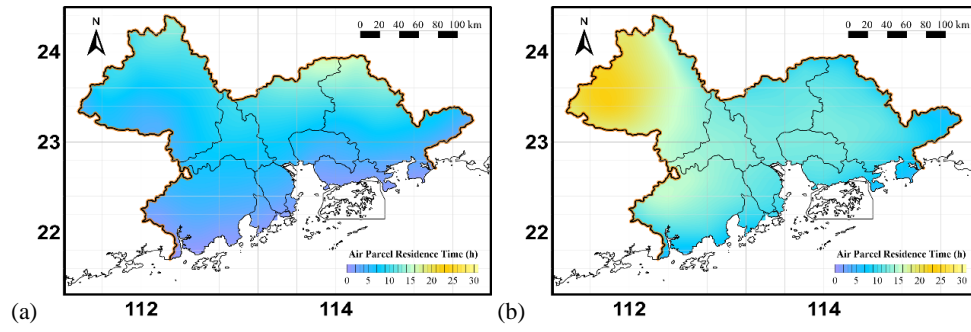

**Figure S7.** The spatial distributions of APRTs in the PRD for the close typhoon-scenarios of (a) autumn and (b) summer.

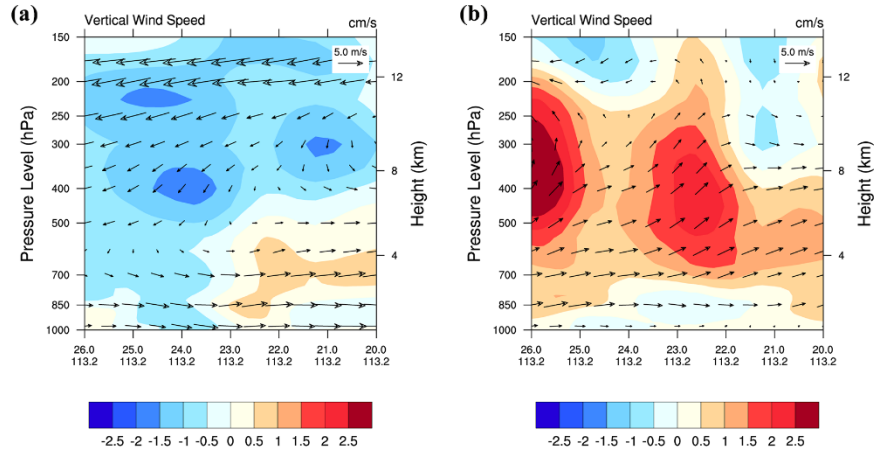

**Figure S8.** The cross section of mean vertical wind field at 14:00 LT for the close typhoon-induced scenario of (a) autumn and (b) summer. Cross sections are made from 26.0°N to 20.0°N along the 113.2°E longitude line (Fig. S4). The vectors indicate meridional wind speed (m/s) and vertical wind speed (cm/s), and the contours indicate vertical wind speed (cm/s).

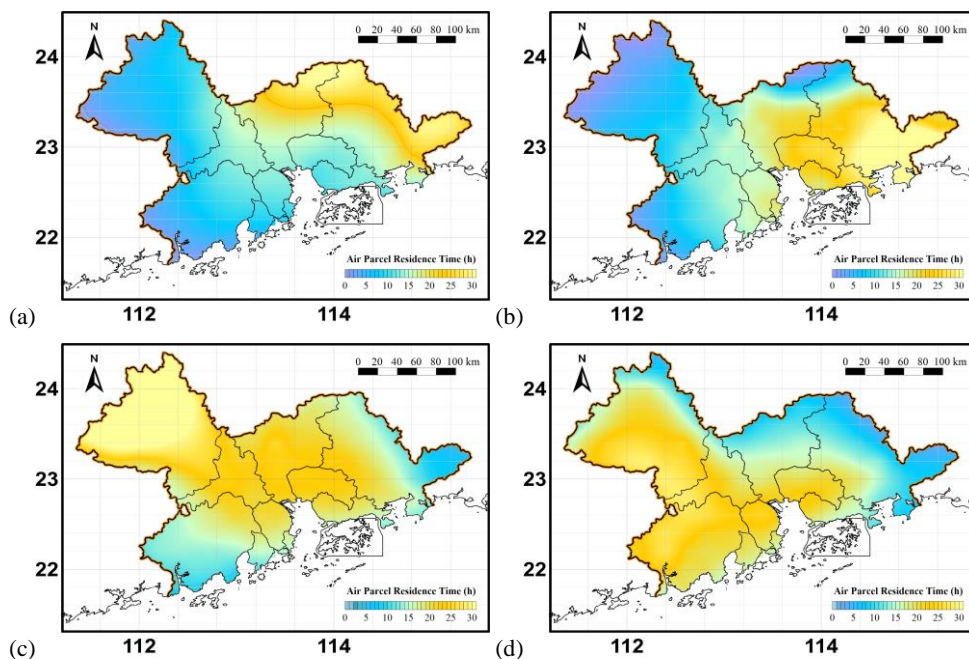

**Figure S9.** The spatial distributions of APRTs in the PRD on the representative O<sub>3</sub> pollution days: (a) the typhoon-induced days in October 2015 (14–16 and 21 October 2015); (b) the no-typhoon days in October 2015 (28 October and 3–5 November 2015); (c) the typhoon-induced days in July 2016 (7–8 and 30–31 July 2016); and (d) the no-typhoon days in July 2016 (22–26 and 29 July 2016).

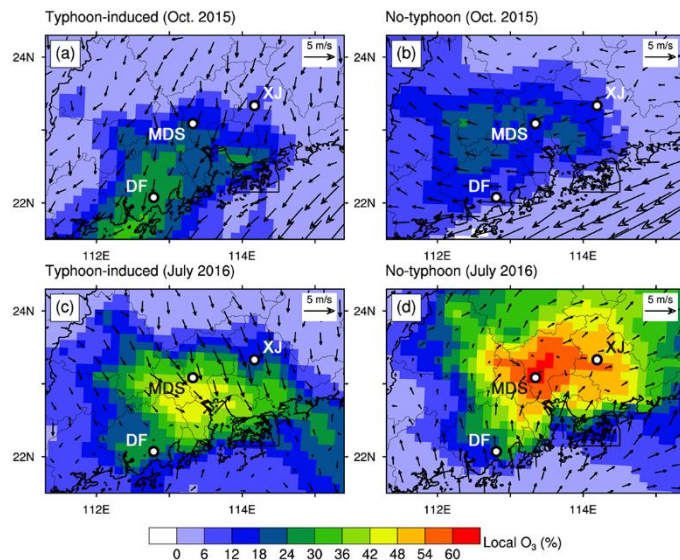

**Figure S10.** The average local contributions (in percentage, %) to daytime (9:00–17:00 LT) O<sub>3</sub> and wind vectors (at 14:00 LT) on the representative O<sub>3</sub> pollution days: (a) the typhoon-induced days in October 2015 (14–16 and 21 October 2015); (b) the no-typhoon days in October 2015 (28 October and 3–5 November 2015); (c) the typhoon-induced days in July 2016 (7–8 and 30–31 July 2016); and (d) the no-typhoon days in July 2016 (22–26 and 29 July 2016). Three representative sites in the PRD are shown as black circles in the plots: XJ, Xijiao; MDS, Modiesha; DF, Duanfen.

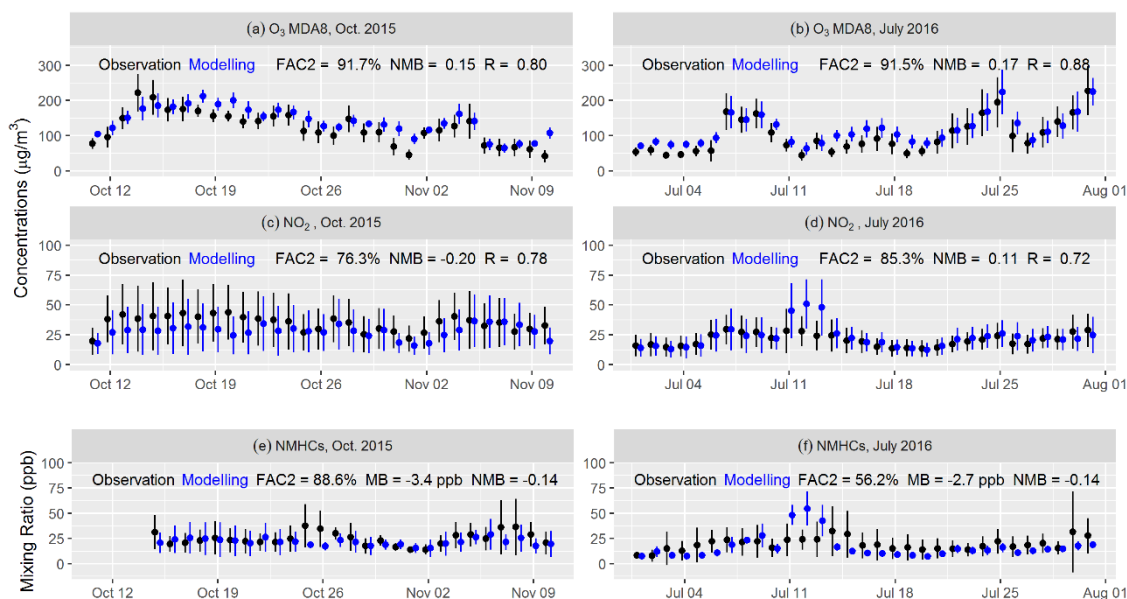

**Figure S11.** Comparisons between the observed and modelled mean O<sub>3</sub> MDA8, daily NO<sub>2</sub> and NMHCs concentrations in the PRD. The lengths of error bars indicate the corresponding standard deviations. FAC2, the fraction of predictions within a factor of two; MB, mean bias; NMB, normalized mean bias; R, correlation factor.

#### S4. References (of the Supplement)

- Chen, X., Liu, Y., Lai, A., Han, S., Fan, Q., Wang, X., Ling, Z., Huang, F., and Fan, S.: Factors dominating 3-dimensional ozone distribution during high tropospheric ozone period, *Environ. Pollut.*, 232, 55–64, <https://doi.org/10.1016/j.envpol.2017.09.017>, 2018.
- Deng, T., Chen, Y., Wan, Q., Zhang, Y., Deng, X., Huang, Y., Dai, G., and Li, F.: Comparative evaluation of the impact of GRAPES and MM5 meteorology on CMAQ prediction over Pearl River Delta, China, *Particuology*, 40, 88–97, <https://doi.org/10.1016/j.partic.2017.10.005>, 2018.
- Tse, J. W. P., Yeung, P. S., Fung, J. C.-H., Ren, C., Wang, R., Wong, M. M.-F., and Cai, M.: Investigation of the meteorological effects of urbanization in recent decades: A case study of major cities in Pearl River Delta, *Urban Climate*, 26, 174–187, <https://doi.org/10.1016/j.uclim.2018.08.007>, 2018.
- Yuan, J., Ling, Z., Wang, Z., Lu, X., Fan, S., He, Z., Guo, H., Wang, X., and Wang, N.: PAN–Precursor Relationship and Process Analysis of PAN Variations in the Pearl River Delta Region, *Atmosphere*, 9, 372, <https://doi.org/10.3390/atmos9100372>, 2018.
